# Supplementary material for: Effect of music on driving performance and physiological and psychological indicators: A systematic review and meta-analysis study
Source: PubMed Central journal article supplement (PMC10790125; doi:10.34172/hpp.2023.32), 2023-12-16
Supplement: hpp-13-267-s001.pdf [file hpp-13-267-s001.pdf]

## Supplementary file 1. Search Strategy

### PubMed Search Strategy

| Set | Strategy                                                                                                                                                                                                                                                                                                                                                                                                                                                                                                      | Results |
|-----|---------------------------------------------------------------------------------------------------------------------------------------------------------------------------------------------------------------------------------------------------------------------------------------------------------------------------------------------------------------------------------------------------------------------------------------------------------------------------------------------------------------|---------|
| #1  | "Accidents, Traffic"[Mesh] OR (("Motor Vehicles"[Mesh:NoExp] OR driv* OR "Automobiles"[Mesh] OR "Motorcycles"[Mesh] OR traffic[tiab] OR vehicle[tiab] OR vehicular[tiab] OR car[tiab] OR cars[tiab] OR automobile[tiab] OR automobiles[tiab] OR motorcycle[tiab] OR motorcycles[tiab] OR taxi[tiab] OR cab[tiab] OR road[tiab] OR pedestrian[tiab] OR pedestrians[tiab]) AND (accident[tiab] OR accidents[tiab] OR injury[tiab] OR injuries[tiab] OR "Wounds and Injuries"[Mesh] OR "injuries" [Subheading])) | 113,383 |
| #2  | (((((music*[Title/Abstract]) OR (Symphony[Title/Abstract])) OR (Rhythm*[Title/Abstract])) OR (Orchestra[Title/Abstract])) OR (Song[Title/Abstract]))                                                                                                                                                                                                                                                                                                                                                          | 171,464 |
| #3  | #1 AND #2                                                                                                                                                                                                                                                                                                                                                                                                                                                                                                     | 443     |

### Scopus Search Strategy

| Set # | Strategy                                                                                                                                                                                                                                                                                                                                                                                                                                                                                                                                                                                     | Results |
|-------|----------------------------------------------------------------------------------------------------------------------------------------------------------------------------------------------------------------------------------------------------------------------------------------------------------------------------------------------------------------------------------------------------------------------------------------------------------------------------------------------------------------------------------------------------------------------------------------------|---------|
| 1     | TITLE-ABS-KEY ( ( ( "Motor Vehicles" OR automobiles OR motorcycles OR traffic OR vehicle OR vehicular OR car OR cars OR automobile OR motorcycle OR taxi OR cab OR road OR pedestrian OR pedestrians ) AND ( accident OR accidents OR injury OR injuries ) ) ) AND ( LIMIT-TO ( SUBJAREA , "MEDI" ) OR LIMIT-TO ( SUBJAREA , "ENGI" ) OR LIMIT-TO ( SUBJAREA , "SOCI" ) OR LIMIT-TO ( SUBJAREA , "HEAL" ) OR LIMIT-TO ( SUBJAREA , "NURS" ) OR LIMIT-TO ( SUBJAREA , "ECON" ) ) AND ( LIMIT-TO ( DOCTYPE , "ar" ) OR LIMIT-TO ( DOCTYPE , "re" ) ) AND ( LIMIT-TO ( LANGUAGE , "English" ) ) | 108,643 |

|          |                                                                                                                                                 |                |
|----------|-------------------------------------------------------------------------------------------------------------------------------------------------|----------------|
| <b>2</b> | ( TITLE-ABS-KEY ( music* ) OR TITLE-ABS-KEY ( symphony ) OR TITLE-ABS-KEY ( rhythm ) OR TITLE-ABS-KEY ( orchestra ) OR TITLE-ABS-KEY ( song ) ) | <b>531,052</b> |
| <b>3</b> | #1 AND #2                                                                                                                                       | <b>675</b>     |

### Search Strategy Web of Science

| <b>Set #</b> |                                                                                                                                                                                                                                                                                                                                                       | <b>Results</b> |
|--------------|-------------------------------------------------------------------------------------------------------------------------------------------------------------------------------------------------------------------------------------------------------------------------------------------------------------------------------------------------------|----------------|
| <b>1</b>     | (TI=("Motor Vehicles" ) OR TI=(automobiles ) OR TI=(motorcycles ) OR TI=(traffic ) OR TI=(vehicle ) OR TI=(vehicular ) OR TI=(car ) OR TS=(cars ) OR TI=(automobile ) OR TI=(motorcycle ) OR TI=(taxi ) OR TS=(cab ) OR TI=(road ) OR TI=(pedestrian ) OR TI=(pedestrians) OR TI=(accident* ) OR TI=(injur*)) AND (DT=="ARTICLE") AND LA=="ENGLISH")) | <b>594,638</b> |
| <b>2</b>     | (AB=(music* ) OR AB=(symphony ) OR AB=(rhythm ) OR AB=(orchestra ) OR AB=(song )) AND (DT=="ARTICLE") AND LA=="ENGLISH"))                                                                                                                                                                                                                             | <b>160,945</b> |
| <b>3</b>     | #1 AND #2                                                                                                                                                                                                                                                                                                                                             | <b>1,532</b>   |
