# Supplementary material for: Effect of music on driving performance and physiological and psychological indicators: A systematic review and meta-analysis study
Source: PubMed Central journal article supplement (PMC10790125; doi:10.34172/hpp.2023.32), 2023-12-16
Supplement: hpp-13-267-s002.pdf [file hpp-13-267-s002.pdf]

Ghojzadeh et al, **Health Promotion Perspectives**, 2023, 13(4), 267-S2.  
 doi: 10.34172/hpp.2023.32  
<https://hpp.tbzmed.ac.ir>

## Supplementary file 2. Data extraction sheet

| Authors | participants number             | Year | Country   | Participants | Participants age (MN/MD) | Participants male | Participants female | Driving experience (Year) | listen to music (%) | Test drive (KM) | Experience | procedure        |              |
|---------|---------------------------------|------|-----------|--------------|--------------------------|-------------------|---------------------|---------------------------|---------------------|-----------------|------------|------------------|--------------|
|         |                                 |      |           |              |                          |                   |                     |                           |                     |                 |            | family condition | testing time |
| 1       | G. M. Hughes et al <sup>1</sup> | 2013 | Australia | 21           | 35                       | 1.00              | 20.00               | NA                        | NA                  | 6.6             | S          | Yes              | daylight     |
| 2       | W. Brodsky et al <sup>2</sup>   | 2013 | pied pale | 85           | 17.6                     | 49                | 36                  | 0.7                       | 86                  | 39.4            | R          | Yes              | NA           |
| 3       | J. Navarro et al <sup>3</sup>   | 2018 | France    | 24           | 22.7                     | 13                | 11                  | 4.2                       | NA                  | NA              | s          | Yes              | NA           |
| 4       | J. Navarro et al <sup>3</sup>   | 2018 | France    | 32           | 23                       | 20                | 12                  | 6                         | NA                  | NA              | s          | Yes              | NA           |

|   |                                       |      |           |    |      |    |    |         |    |    |   |     |    |
|---|---------------------------------------|------|-----------|----|------|----|----|---------|----|----|---|-----|----|
| 5 | W. Consiglio et al <sup>4</sup>       | 2003 | USA       | 22 | 21   | 11 | 11 | NA      | NA | NA | L | Yes | NA |
| 6 | C. I. Karageorghis et al <sup>5</sup> | 2022 | UK        | 43 | 29.8 | 23 | 23 | 10.4    | NA | NA | s | Yes | NA |
| 7 | H. C. Beh et al <sup>6</sup>          | 1999 | Australia | 45 | 20.4 | 21 | 24 | least 2 | NA | NA | L | Yes | NA |
| 8 | J. Navarro et al <sup>7</sup>         | 2019 | France    | 23 | NA   | NA | NA | NA      | NA | NA | S | Yes | NA |

|    |                                     |      |          |     |      |    |     |     |     |    |   |     |          |
|----|-------------------------------------|------|----------|-----|------|----|-----|-----|-----|----|---|-----|----------|
| 9  | A. B. Ünal et al <sup>8</sup>       | 2013 | Netherla | 47  | 20.7 | 26 | 21  | 2.6 | NA  | NA | S | Yes | daylight |
| 10 | D. B. Bellinger et al <sup>9</sup>  | 2009 | USA      | 27  | 20.9 | 16 | 11  | 5.3 | 96  | NA | L | Yes | NA       |
| 11 | A. Mohunta <sup>10</sup>            | 2022 | India    | 8   | 45   | 4  | 4   | NA  | NA  | NA | R | NA  | daylight |
| 12 | Z. N. Jimison <sup>11</sup>         | 2014 | USA      | 165 | 21   | 47 | 118 | NA  | NA  | NA | S | Yes | NA       |
| 13 | E. L. Henry <sup>12</sup>           | 2006 | USA      | 36  | 22.4 | 10 | 26  | 6.4 | 94  | NA | L | Yes | NA       |
| 14 | A. Febriandirza et al <sup>13</sup> | 2017 | China    | 98  | 24.4 | 49 | 49  | 5.3 | 100 | NA | S | Yes | NA       |
| 15 | G. G. Cassidy et al <sup>14</sup>   | 2010 | UK       | 70  | 20.5 | 38 | 32  | NA  | NA  | NA | S | Yes | NA       |

|    |                                |      |           |     |      |    |    |      |      |    |   |     |          |
|----|--------------------------------|------|-----------|-----|------|----|----|------|------|----|---|-----|----------|
| 16 | G. Cassidy et al <sup>15</sup> | 2009 | UK        | 125 | 21.2 | 60 | 65 | NA   | NA   | NA | S | Yes | NA       |
| 17 | W. Brodsky <sup>16</sup>       | 2001 | pied pale | 28  | 25   | 10 | 18 | 7    | 100  | NA | S | Yes | NA       |
| 18 | M. A. Alves <sup>17</sup>      | 2019 | Brazil    | 5   | 20.8 | 0  | 5  | NA   | NA   | 3  | R | NA  | daylight |
| 19 | A. B. Ünal et al <sup>18</sup> | 2012 | Netherla  | 69  | 21   | 23 | 46 | 2.92 | NA   | NA | S | Yes | NA       |
| 20 | L. Miao et al <sup>19</sup>    | 2021 | China     | 37  | 23.5 | 23 | 14 | 0.62 | 93.2 | NA | S | Yes | daylight |

simulator

Music

| control | fixed or<br>portable | open<br>source | screen (Inch) | screen view | music<br>numb | Music/test<br>duration | music | Music | Music | Music |
|---------|----------------------|----------------|---------------|-------------|---------------|------------------------|-------|-------|-------|-------|
|---------|----------------------|----------------|---------------|-------------|---------------|------------------------|-------|-------|-------|-------|

-Faros (Lanni Portable NA NA 120 2 NA NA Rsel yes NA

12 NA no Dsel yes NA

NO simulatorNO simulatoO simulat NO simulator NO simulator

8 34 no Rsel no M

Logitech G27® fixed yes 19 NA 7 55 NA Dsel yes S, M, F

Logitech G27® fixed yes 20 NA 12 30 no Rsel yes S, M, F

|              |              |           |              |              |   |    |    |      |    |    |
|--------------|--------------|-----------|--------------|--------------|---|----|----|------|----|----|
| NO simulator | NO simulator | O simulat | NO simulator | NO simulator | 1 | NA | NA | Rsel | NA | NA |
|--------------|--------------|-----------|--------------|--------------|---|----|----|------|----|----|

|            |       |     |    |    |   |    |    |      |     |      |
|------------|-------|-----|----|----|---|----|----|------|-----|------|
| OpenDS 4.0 | fixed | yes | 32 | NA | 4 | 16 | NA | Rsel | yes | F, S |
|------------|-------|-----|----|----|---|----|----|------|-----|------|

|              |              |           |    |    |    |    |    |      |    |    |
|--------------|--------------|-----------|----|----|----|----|----|------|----|----|
| NO simulator | NO simulator | O simulat | 14 | NA | NA | 20 | NA | Rsel | NA | NA |
|--------------|--------------|-----------|----|----|----|----|----|------|----|----|

|        |    |     |    |       |    |    |   |      |    |         |
|--------|----|-----|----|-------|----|----|---|------|----|---------|
| BB_Sim | NA | yes | 48 | 137.5 | NA | 50 | N | Dsel | NA | S, M, F |
|--------|----|-----|----|-------|----|----|---|------|----|---------|

|                    |              |              |              |              |    |    |    |            |          |         |
|--------------------|--------------|--------------|--------------|--------------|----|----|----|------------|----------|---------|
|                    |              |              |              | 240          | NA | 30 | NA | Dsel       | yes      | NA      |
| StSoftware         | fixed        | NA           | NA           |              |    |    |    |            |          |         |
| NO simulator       | NO simulator | NO simulator | NO simulator | NO simulator | 1  | NA | NA | Rsel       | yes      | NA      |
| NO simulator       | NO simulator | NO simulator | NO simulator | NO simulator | 2  | NA | NA | Rsel       | yes      | NA      |
| IM (Build 2.06.00) |              | NA           | NA           | NA           | 10 | 24 | N  | Rsel, Dsel | yes , No | S, M, F |
| NO simulator       | NO simulator | NO simulator | NO simulator | NO simulator | 1  | NA | NA | Rsel       | yes      | NA      |
| NA                 | fixed        | NA           | NA           | 180          | NA | 35 | NA | Rsel       | NA       | S, M, F |
| NA                 | NA           | NA           | NA           | NA           | NA | NA | NA | Rsel, Dsel | no       | S, M, F |

|             |    |    |    |    |    |    |    |            |     |         |
|-------------|----|----|----|----|----|----|----|------------|-----|---------|
| server Pack | NA | NA | NA | NA | 25 | NA | NA | Dsel, Rsel | yes | S, M, F |
|-------------|----|----|----|----|----|----|----|------------|-----|---------|

|          |    |    |    |    |    |    |    |      |    |         |
|----------|----|----|----|----|----|----|----|------|----|---------|
| Desk pro | NA | NA | 17 | NA | 12 | 90 | NA | Rsel | NA | S, M, F |
|----------|----|----|----|----|----|----|----|------|----|---------|

|              |              |           |              |              |   |    |   |      |    |    |
|--------------|--------------|-----------|--------------|--------------|---|----|---|------|----|----|
| NO simulator | NO simulator | O simulat | NO simulator | NO simulator | 5 | 20 | N | Rsel | NA | NA |
|--------------|--------------|-----------|--------------|--------------|---|----|---|------|----|----|

|    |       |    |    |     |    |    |    |      |     |    |
|----|-------|----|----|-----|----|----|----|------|-----|----|
| NA | Fixed | NA | NA | 180 | NA | 35 | NA | Dsel | yes | NA |
|----|-------|----|----|-----|----|----|----|------|-----|----|

|    |    |    |    |    |   |    |    |      |     |         |
|----|----|----|----|----|---|----|----|------|-----|---------|
| NA | NA | NA | NA | NA | 3 | 30 | NA | Rsel | yes | S, M, F |
|----|----|----|----|----|---|----|----|------|-----|---------|

| Music | Music | Music                       | Outcome name                                        | Outcome in |
|-------|-------|-----------------------------|-----------------------------------------------------|------------|
|       |       |                             | Mean speed                                          | 54.8       |
|       |       |                             | Speed variability                                   | 4.28       |
| L     | yes   | NA                          | Lane position variability                           | 0.27       |
|       |       |                             | Mean lane excursions                                | 0.14       |
|       |       |                             | Mean PDT response time(s)                           | 1.15       |
|       |       |                             | Average mental workload (out of 10)                 | 4.4        |
|       |       |                             | Participant mood states (POMS)                      | 1.89       |
|       |       |                             | Effect of music on mood                             | 0.72       |
| H     | NA    | Rk, Ea, El, TV, HR, Rp, RB, | at least one violation (%)                          | 98         |
|       |       |                             | Severity of deficient driver behavior               | 53.89      |
|       |       |                             | event-frequency                                     | 11.93      |
|       |       |                             | event-severity                                      | 189        |
|       |       |                             | Participant mood states (POMS)                      | 1.24       |
|       |       |                             | Effect of music on mood                             | 0.06       |
|       |       |                             | at least one violation (%)                          | 90         |
| H     | no    | Ea, Jz, O                   | Severity of deficient driver behavior               | 40.42      |
|       |       |                             | event-frequency                                     | 10.09(6.8) |
|       |       |                             | event-severity                                      | 157(111)   |
|       |       |                             | Mean heart rate                                     | 87,9       |
|       |       |                             | mean level of arousal (12 to 48)                    | 27.4       |
|       |       |                             | mean level of pleasantness (16 to 64)               | 51.4       |
| M     | NA    | NA                          | Mean intervehicular time                            | 3.8        |
|       |       |                             | Coherence                                           | 0.6        |
|       |       |                             | Delay (in seconds)                                  | 3.03       |
|       |       |                             | Gain                                                | 0.54       |
|       |       |                             | Mean heart rate (fast tempo)                        | 87.5       |
|       |       |                             | Mean heart rate (medium tempo)                      | 86.7       |
|       |       |                             | Mean heart rate (slow tempo)                        | 86.5       |
|       |       |                             | mean level of arousal (12 to 48) (fast tempo)       | 28.6       |
|       |       |                             | mean level of arousal (12 to 48) (medium tempo)     | 28.8       |
|       |       |                             | mean level of arousal (12 to 48)(slow tempo)        | 28.2       |
|       |       |                             | mean level of pleasantness (16 to 64)(fast tempo)   | 50.9       |
|       |       |                             | mean level of pleasantness (16 to 64)(medium tempo) | 50.5       |
|       |       |                             | mean level of pleasantness (16 to 64)(slow tempo)   | 50         |
|       |       |                             | Mean intervehicular time (Slow)                     | 3.7        |
|       |       |                             | Mean intervehicular time (medium)                   | 3.6        |
| M     | NA    | Rk, Co, Jz, RB              | Mean intervehicular time (Fast)                     | 3.7        |
|       |       |                             | Coherence (Slow)                                    | 0.77       |
|       |       |                             | Coherence (medium)                                  | 0.76       |
|       |       |                             | Coherence (Fast)                                    | 0.7        |
|       |       |                             | Delay (in seconds) (Slow)                           | 2.5        |
|       |       |                             | Delay (in seconds) (medium)                         | 2.6        |

|     |     |     |                                                                      |       |
|-----|-----|-----|----------------------------------------------------------------------|-------|
|     |     |     | Delay (in seconds) (Fast)                                            | 2.5   |
|     |     |     | Gain                                                                 | 0.77  |
|     |     |     | Gain                                                                 | 0.74  |
|     |     |     | Gain                                                                 | 0.66  |
| NA  | NA  | Rk  | Mean reaction time                                                   | 0.408 |
|     |     |     | NASA TaskLoadIndex(NASA-TLX) (H-F)                                   | 7.63  |
|     |     |     | NASA TaskLoadIndex(NASA-TLX) (H-S)                                   | 7.03  |
|     |     |     | NASA TaskLoadIndex(NASA-TLX) (L-F)                                   | 4.18  |
|     |     |     | NASA TaskLoadIndex(NASA-TLX) (L-S)                                   | 4.21  |
|     |     |     | Affective arousal (H-F)                                              | 5.7   |
|     |     |     | Affective arousal (H-S)                                              | 3.85  |
|     |     |     | Affective arousal (L-F)                                              | 4.85  |
|     |     |     | Affective arousal (L-S)                                              | 3.09  |
| L,H | yes | con | Affective valence (H-F)                                              | 6.8   |
|     |     |     | Affective valence(H-S)                                               | 7.02  |
|     |     |     | Affective valence (L-F)                                              | 7.13  |
|     |     |     | Affective valence (L-S)                                              | 7.28  |
|     |     |     | Mean heart rate (H-F)                                                | 78.44 |
|     |     |     | Mean heart rate (H-S)                                                | 78.16 |
|     |     |     | Mean heart rate (L-F)                                                | 76.47 |
|     |     |     | Mean heart rate (L-S)                                                | 76.2  |
|     |     |     | Heart rate variability (RMSSD) (H-F)                                 | 38.77 |
|     |     |     | Heart rate variability (RMSSD) (H-S)                                 | 44.89 |
|     |     |     | Heart rate variability (RMSSD) (L-F)                                 | 41.82 |
|     |     |     | Heart rate variability (RMSSD) (L-S)                                 | 49.2  |
|     |     |     | Mean response time (Stop-light task)/low-intensity music (LIM)/low   | 392   |
|     |     |     | Mean response time (Stop-light task)/low-intensity music (LIM)/High  | 426   |
|     |     |     | Mean response time (Stop-light task)/High-intensity music (LIM)/low  | 502.6 |
| L,H | NA  | HR  | Mean response time (Stop-light task)/High-intensity music (LIM)/High | 518   |
|     |     |     | Mean response time (vigilance task)/low-intensity music (LIM)/low    | 595   |
|     |     |     | Mean response time (vigilance task)/low-intensity music (LIM)/High   | 632   |
|     |     |     | Mean response time (vigilance task)/high-intensity music (HIM)/low   | 550   |
|     |     |     | Mean response time (vigilance task)/High-intensity music (HIM)/high  | 512.6 |
|     |     |     | pleasant-unpleasant                                                  | 50.5  |
|     |     |     | positive-tired                                                       | 19.9  |
|     |     |     | arousal-calm                                                         | 25    |
|     |     |     | negative-relaxed                                                     | 9.1   |
| L   | NA  | NA  | Mean heart rate                                                      | 86.6  |
|     |     |     | Heart rate variability                                               | 5.8   |
|     |     |     | Mean intervehicular time                                             | 4.7   |
|     |     |     | Mean inter-vehicular time standard deviation.                        | 1.32  |
|     |     |     | coherence (high)/mean                                                | 0.8   |
|     |     |     | coherence (Moderate)mean                                             | 0.671 |

|        |     |                |                                                   |       |
|--------|-----|----------------|---------------------------------------------------|-------|
|        |     |                | delay in response (high)                          | 3.25  |
|        |     |                | delay in response (Moderate)                      | 3.95  |
| M or H | NA  | NA             | SDLP (high)/mean                                  | 0.246 |
|        |     |                | SDLP (Moderate)/mean                              | 0.243 |
|        |     |                | mean level of arousal                             | 3.69  |
|        |     |                | mean heart rate                                   | 84.2  |
|        |     |                | heart rate variability                            | 6.9   |
|        |     |                | Response time (moderate volume)                   | 585.6 |
|        |     |                | Response time (high volume)                       | 584.9 |
| M, H   | NA  | RK             | Reaction time (moderate volume)                   | 389.6 |
|        |     |                | Reaction time (high volume)                       | 389.9 |
|        |     |                | Movement time (moderate volume)                   | 196   |
|        |     |                | Movement time (high volume)                       | 195   |
| L,H    | yes | TV             | Mean speed (low volume)                           | 43.8  |
|        |     |                | Mean speed (high volume)                          | 56.6  |
| M      | NA  | Rk             | Mean speed                                        | 35.34 |
| L,H    | NA  | Rk             | Mean Error rate (low volume)                      | 17.47 |
|        |     |                | Mean Error rate (high volume)                     | 16.61 |
|        |     |                | SDS (Classical Music)                             | 2.08  |
|        |     |                | SDS (Hard Rock Music)                             | 2.43  |
|        |     |                | SDLP (Classical Music)                            | 21.25 |
|        |     |                | SDLP (Hard Rock Music)                            | 22.8  |
|        |     |                | experience ratings/Control(Classical Music)       | 6.51  |
| H      | NA  | Cl, HR         | experience ratings/Control (Hard Rock Music)      | 3.09  |
|        |     |                | experience ratings/Concentration(Classical Music) | 6.68  |
|        |     |                | experience ratings/Concentration(Hard Rock Music) | 3.27  |
|        |     |                | experience ratings/Enjoyment(Classical Music)     | 6.59  |
|        |     |                | experience ratings/Enjoyment(Hard Rock Music)     | 3.38  |
|        |     |                | experience ratings/Distracton(Classical Music)    | 4.45  |
|        |     |                | experience ratings/Distracton(Hard Rock Music)    | 8.27  |
|        |     |                | Lap time (s)/ low-arousal music (70 bpm)          | 124.1 |
|        |     |                | Lap time (s)/ low-arousal music (130 bpm)         | 121.5 |
|        |     |                | Lap time (s)/ high-arousal music (70 bpm)         | 101.6 |
|        |     |                | Lap time (s)/high-arousal music (130pm)           | 98.8  |
|        |     |                | Lap time (s)/ self-selected music                 | 99.2  |
|        |     |                | Inaccuracy/ low-arousal music (70 bpm)            | 7.3   |
|        |     |                | Inaccuracy/ low-arousal music (130 bpm)           | 7.4   |
|        |     |                | Inaccuracy/ high-arousal music (70 bpm)           | 15.4  |
|        |     |                | Inaccuracy/ high-arousal music (130pm)            | 18.7  |
|        |     |                | Inaccuracy/ self-selected music                   | 3     |
|        |     |                | Lap speed (mph)/low-arousal music (70 bpm)        | 25.1  |
|        |     |                | Lap speed (mph)/low-arousal music (130 bpm)       | 27.5  |
| L      | NA  | Rk, Cl, HR, Jz | Lap speed (mph)/high-arousal music (70 bpm)       | 40.3  |
|        |     |                | Lap speed (mph)/high-arousal music (130pm)        | 43.6  |
|        |     |                | Lap speed (mph)/self-selected music               | 43.5  |
|        |     |                | Distracton/ low-arousal music (70 bpm)            | 4     |
|        |     |                | Distracton/ low-arousal music (130 bpm)           | 3.8   |

|    |     |                |                                                 |       |
|----|-----|----------------|-------------------------------------------------|-------|
|    |     |                | Distraction/ high-arousal music (70 bpm)        | 5.9   |
|    |     |                | Distraction/high-arousal music (130pm)          | 7.6   |
|    |     |                | Distraction/ self-selected music                | 2.1   |
|    |     |                | Enjoyment/ low-arousal music (70 bpm)           | 3.6   |
|    |     |                | Enjoyment/ low-arousal music (130 bpm)          | 3.6   |
|    |     |                | Enjoyment/ high-arousal music (70 bpm)          | 2.2   |
|    |     |                | Enjoyment/high-arousal music (130pm)            | 2.4   |
|    |     |                | Enjoyment/ self-selected music                  | 9.6   |
|    |     |                | Lap time (s)/ low-arousal music (70 bpm)        | 116.2 |
|    |     |                | Lap time (s)/high-arousal music (130pm)         | 94.3  |
|    |     |                | Lap time (s)/ self-selected music               | 93.1  |
|    |     |                | Inaccuracy/ low-arousal music (70 bpm)          | 9.9   |
| L  | yes | Rk             | Inaccuracy/ high-arousal music (130pm)          | 21.2  |
|    |     |                | Inaccuracy/ self-selected music                 | 5.4   |
|    |     |                | Lap speed (mph)/low-arousal music (70 bpm)      | 23.6  |
|    |     |                | Lap speed (mph)/high-arousal music (130pm)      | 38.3  |
|    |     |                | Lap speed (mph)/self-selected music             | 41.5  |
|    |     |                | Heart rate variability                          | 2.86  |
|    |     |                | Mean speed (slow tempo)                         | 141.1 |
| H  | yes | Rk, Co, Jz, RB | Mean speed (medium-tempo)                       | 143.1 |
|    |     |                | Mean speed (fast tempo)                         | 147.4 |
| NA | NA  | NA             | Heart rate variability (linear analysis-RMSSD)  | 29.72 |
|    |     |                | coherence                                       | 0.71  |
|    |     |                | delay in response                               | 3.44  |
| H  | NA  | NA             | SDS                                             | 6.72  |
|    |     |                | time-to-contact with the parked car driving off | 1.12  |
|    |     |                | Subjective Load Value (slow tempo)              | 4.41  |
|    |     |                | Subjective Load Value (medium-tempo)            | 4.85  |
|    |     |                | Subjective Load Value (fast tempo)              | 5.43  |
|    |     |                | Heart Rate (slow tempo)                         | 74.6  |
|    |     |                | Heart Rate (medium-tempo)                       | 76.99 |
|    |     |                | Heart Rate (fast tempo)                         | 80.39 |
|    |     |                | R-R Interval (ms) (slow tempo)                  | 816.7 |
|    |     |                | R-R Interval (ms) (medium-tempo)                | 791   |
|    |     |                | R-R Interval (ms) (fast tempo)                  | 777.4 |
| M  | no  | light melodies | Skin Temperature (slow tempo)                   | 32.6  |
|    |     |                | Skin Temperature (medium-tempo)                 | 33.1  |
|    |     |                | Skin Temperature (fast tempo)                   | 33.3  |
|    |     |                | Respiratory Rate (brpm) (slow tempo)            | 17.8  |
|    |     |                | Respiratory Rate (brpm) (medium-tempo)          | 17.88 |
|    |     |                | Respiratory Rate (brpm) (fast tempo)            | 18.15 |
|    |     |                | Hazard Perception (slow tempo)                  | 31.53 |
|    |     |                | Hazard Perception (medium-tempo)                | 26    |
|    |     |                | Hazard Perception (fast tempo)                  | 25.86 |

| SD/SE             | Outcome in  | SD/SE | Outcome |    |
|-------------------|-------------|-------|---------|----|
| Outcome direction |             |       |         |    |
| 0.9               | 60.25       | 1.22  | Y       | Po |
| 0.22              | 4           | 0.13  | N       | Ne |
| 0.01              | 0.32        | 0.02  | Y       | Po |
| 0.01              | 0.22        | 0.03  | y       | Po |
| 0.03              | 1.05        | 0.03  | y       | Ne |
| 0.28              | 4.2         | 0.3   | N       | Po |
| 0.59              | 1.17        | 0.89  | y       | Po |
| 0.88              |             |       | y       | Po |
|                   | 92          |       | y       | Ne |
| 31.4              | 50.68       | 37.3  | y       | Ne |
| 7.5               | 10.12       | 6.8   | y       | Ne |
| 132               | 158         | 120   | y       | Ne |
| 0.77              | 1.17        | 0.89  | y       | po |
| 0.83              |             |       | y       | Po |
|                   | 92          |       | y       | Ne |
| 25.8              | 50.68       | 37.3  | y       | Po |
|                   | 10.12 (6.8) |       | y       | Po |
|                   | 158 (120)   |       | y       | Po |
| 0.4               | 84,6        | 0.7   | y       | Ne |
| 2.8               | 24.7        | 2.9   | y       | Po |
| 3                 | 48.6        | 2.9   | y       | po |
| 0.1               | 4.5         | 0.2   | y       | Ne |
| 0.05              | 0.47        | 0.05  | N       | po |
| 0.21              | 3.48        | 0.3   | N       | po |
| 0.04              | 0.42        | 0.04  | N       | po |
|                   | 85.8        |       | N       | Ne |
|                   | 85.8        |       | N       | Ne |
|                   | 85.8        |       | N       | Ne |
|                   | 28.4        |       | N       | Po |
|                   | 28.4        |       | N       | Po |
|                   | 28.4        |       | N       | Ne |
|                   | 50.3        |       | N       | Po |
|                   | 50.3        |       | N       | Po |
|                   | 50.3        |       | N       | Ne |
| 0.12              | 4           | 0.1   | N       | Ne |
| 0.11              | 4           | 0.1   | N       | Ne |
| 0.12              | 4           | 0.1   | N       | Ne |
| 0.012             | 0.7         | 0.02  | y       | Po |
| 0.012             | 0.7         | 0.02  | y       | Po |
| 0,030             | 0.7         | 0.02  | y       | Po |
| 0.12              | 3           | 0.25  | N       | Po |
| 0.11              | 3           | 0.25  | N       | Po |



|       |       |       |   |    |
|-------|-------|-------|---|----|
| 0.53  | 3.3   | 0.51  | N | Ne |
| 0.58  | 5.2   | 0.48  | Y | Ne |
| 0.073 | 0.256 | 0.07  | N | Po |
| 0.056 | 0.276 | 0.07  | N | Po |
| 1.16  | 5.01  | 0.94  | Y | Po |
| 12.6  | 81    | 12.38 | Y | Ne |
| 0.62  | 6.89  | 0.68  | N | po |
| 98    | 601.6 | 112   | N | Ne |
| 84.6  | 601.6 | 112   | N | Ne |
| 48    | 387   | 50.5  | N | Po |
| 56.2  | 387   | 50.5  | N | Po |
| 41.8  | 214.6 | 39.3  | N | Ne |
| 28.4  | 214.6 | 39.3  | N | Ne |
| 7.9   | 53.5  | 4.87  | Y | Po |
| 10.9  | 53.5  | 4.87  | N | Ne |
| 1.28  | 34.99 | 1.33  | Y | Ne |
| 3.3   | 17.5  | 2.2   | Y | Ne |
| 2.58  | 17.5  | 2.2   | Y | Ne |
| 0.14  | 2.25  | 0.11  | Y | Po |
| 0.14  | 2.25  | 0.11  | Y | Ne |
| 0.56  | 21.75 | 0.53  | Y | Po |
| 0.79  | 21.75 | 0.53  | Y | Ne |
| 0.5   | 4.24  | 0.66  | Y | Po |
| 0.7   | 4.24  | 0.66  | Y | Ne |
| 0.62  | 4.34  | 0.73  | Y | Po |
| 0.68  | 4.34  | 0.73  | Y | Ne |
| 0.59  | 4.32  | 0.65  | Y | Po |
| 0.62  | 4.32  | 0.65  | Y | Ne |
| 0.52  | 5.04  | 0.59  | Y | Po |
| 0.65  | 5.04  | 0.59  | Y | Ne |
| 5.5   | 112.7 | 6.1   | Y | po |
| 5.6   | 112.7 | 6.1   | Y | po |
| 5     | 112.7 | 6.1   | Y | Ne |
| 6.5   | 112.7 | 6.1   | Y | Ne |
| 7.4   | 112.7 | 6.1   | Y | Ne |
| 1.9   | 6.5   | 2.2   | Y | Ne |
| 1.9   | 6.5   | 2.2   | Y | Ne |
| 2.6   | 6.5   | 2.2   | Y | Ne |
| 2.9   | 6.5   | 2.2   | Y | Ne |
| 1.9   | 6.5   | 2.2   | Y | po |
| 4.4   | 31.9  | 3.4   | Y | po |
| 3.9   | 31.9  | 3.4   | Y | po |
| 4.3   | 31.9  | 3.4   | Y | Ne |
| 4.4   | 31.9  | 3.4   | Y | Ne |
| 4.5   | 31.9  | 3.4   | Y | Ne |
| 1.1   | 3.3   | 1.1   | Y | Ne |
| 1     | 3.3   | 1.1   | Y | Ne |

|      |       |       |    |   |    |
|------|-------|-------|----|---|----|
| 1.2  | 3.3   | 1.1   |    | Y | Ne |
| 1.1  | 3.3   | 1.1   |    | Y | Ne |
| 0.9  | 3.3   | 1.1   |    | Y | po |
| 1.2  | 2.7   | 1.2   |    | Y | po |
| 1.2  | 2.7   | 1.2   |    | Y | po |
| 2.2  | 2.7   | 1.2   |    | Y | Ne |
| 1    | 2.7   | 1.2   |    | Y | Ne |
| 1.5  | 2.7   | 1.2   |    | Y | po |
| 7.7  | 105.7 | 9.4   |    | Y | po |
| 7.3  | 105.7 | 9.4   |    | Y | Ne |
| 9.8  | 105.7 | 9.4   |    | Y | Ne |
| 2.7  | 9     | 3     |    | Y | po |
| 5.1  | 9     | 3     |    | Y | po |
| 2.1  | 9     | 3     |    | Y | Ne |
| 3.2  | 28.2  | 3.6   |    | Y | po |
| 7.1  | 28.2  | 3.6   |    | Y | Ne |
| 4.7  | 28.2  | 3.6   |    | Y | Ne |
| 0.71 | 3.43  | 1.3   |    | Y | po |
| 32.1 | 144.5 | 30.18 | NA |   | Po |
| 26.9 | 144.5 | 30.18 | NA |   | Po |
| 30.9 | 144.5 | 30.18 | NA |   | Ne |
| 17.7 | 26.66 | 5.4   |    | N | Po |
| 0.16 | 0.66  | 0.18  |    | N | Ne |
| 1.29 | 4.65  | 1.92  |    | Y | Po |
| 1.48 | 5.74  | 1.81  |    | y | Ne |
| 0.25 | 0.97  | 0.3   |    | N | Po |
| 1.11 | 4.68  | 1.36  |    | y | Ne |
| 1.29 | 4.68  | 1.36  |    | y | Po |
| 1.25 | 4.68  | 1.36  |    | y | Po |
| 7.41 | 76.32 | 7.92  |    | y | Ne |
| 7.53 | 76.32 | 7.92  |    | y | Po |
| 8    | 76.32 | 7.92  |    | y | Po |
| 91.7 | 795.5 | 89.5  |    | y | Ne |
| 85.1 | 795.5 | 89.5  |    | y | Po |
| 96   | 795.5 | 89.5  |    | y | Po |
| 1    | 32.8  | 1     |    | y | Ne |
| 1.1  | 32.8  | 1     |    | y | Po |
| 0.9  | 32.8  | 1     |    | y | Po |
| 0.64 | 17.85 | 0.56  |    | y | Ne |
| 0.55 | 17.85 | 0.56  |    | y | Po |
| 0.26 | 17.85 | 0.56  |    | y | Po |
| 5.27 | 28.78 | 6.96  |    | y | Po |
| 7.18 | 28.78 | 6.96  |    | y | Ne |
| 6.13 | 28.78 | 6.96  |    | y | Ne |

1. Hughes GM, Rudin-Brown CM, Young KL. A simulator study of the effects of singing on driving performance. *Accid Anal Prev.* 2013; 50: 787-92. doi:10.1016/j.aap.2012.07.001
2. Brodsky W, Slor Z. Background music as a risk factor for distraction among young-novice drivers. *Accid Anal Prev.* 2013; 59: 382-93. doi:10.1016/j.aap.2013.06.022
3. Navarro J, Osiurak F, Reynaud E. Does the Tempo of Music Impact Human Behavior Behind the Wheel? *Hum Factors.* 2018; 60(4): 556-74. doi:10.1177/0018720818760901
4. Consiglio W, Driscoll P, Witte M, Berg WP. Effect of cellular telephone conversations and other potential interference on reaction time in a braking response. *Accident Analysis and Prevention.* 2003; 35(4): 495-500. doi:10.1016/S0001-4575(02)00027-1
5. Karageorghis CI, Payre W, Howard LW, Kuan G, Mouchlianitis E, Reed N, *et al.* Influence of music on driver psychology and safety-relevant behaviours: a multi-study inductive content analysis. *Theoretical issues in ergonomics science.* 2022; 23(6): 643-62. doi:<https://doi.org/10.1080/1463922X.2021.2009933>
6. Beh HC, Hirst R. Performance on driving-related tasks during music. *Ergonomics.* 1999; 42(8): 1087-98. doi:10.1080/001401399185153
7. Navarro J, Osiurak F, Gaujoux V, Ouimet MC, Reynaud E. Driving Under the Influence: How Music Listening Affects Driving Behaviors. *J Vis Exp.* 2019; (145). doi:10.3791/58342
8. Ünal AB, de Waard D, Epstude K, Steg L. Driving with music: Effects on arousal and performance. *Transportation Research Part F: Traffic Psychology and Behaviour.* 2013; 21: 52-65. doi:<https://doi.org/10.1016/j.trf.2013.09.004>
9. Bellinger DB, Budde BM, Machida M, Richardson GB, Berg WP. The effect of cellular telephone conversation and music listening on response time in braking. *Transportation Research Part F: Traffic Psychology and Behaviour.* 2009; 12(6): 441-51. doi:10.1016/j.trf.2009.08.007
10. Mohunta A. The Effect of Music Energy on Driving Speed. *The National High School Journal of Science.* 2022: 1-4.
11. Jimison ZN. The effect of music familiarity on Driving: A simulated study of the impact of music familiarity under different driving conditions. 2014.
12. Henry EL. Effect of Music Volume on Simulated Interstate Driving Skills. 2006.
13. Febriandirza A, Chaozhong W, Zhong M, Hu Z, Zhang H. The Effect of Natural Sounds and Music on Driving Performance and Physiological. *Engineering letters.* 2017 25(4).
14. Cassidy GG, Macdonald RA. The effects of music on time perception and performance of a driving game. *Scand J Psychol.* 2010; 51(6): 455-64. doi:10.1111/j.1467-9450.2010.00830.x
15. Cassidy G, Macdonald R. The effects of music choice on task performance: A study of the impact of self-selected and experimenter-selected music on driving game performance and experience. *Musicae Scientiae.* 2009; 13(2): 357-86. doi:10.1177/102986490901300207
16. Brodsky W. The effects of music tempo on simulated driving performance and vehicular control. *Transportation Research Part F: Traffic Psychology and Behaviour.* 2001; 4(4): 219-41. doi:10.1016/S1369-8478(01)00025-0
17. Alves MA, Garner DM, do Amaral JAT, Oliveira FR, Valenti VE. The effects of musical auditory stimulation on heart rate autonomic responses to driving: A prospective randomized case-control pilot study. *Complement Ther Med.* 2019; 46: 158-64. doi:10.1016/j.ctim.2019.08.006
18. Ünal AB, Steg L, Epstude K. The influence of music on mental effort and driving performance. *Accid Anal Prev.* 2012; 48: 271-8. doi:10.1016/j.aap.2012.01.022
19. Miao L, Gu Y, He L, Wang H, Schwebel DC, Shen Y. The influence of music tempo on mental load and hazard perception of novice drivers. *Accid Anal Prev.* 2021; 157: 106168. doi:10.1016/j.aap.2021.106168
