# Supplementary material for: Effect of music on driving performance and physiological and psychological indicators: A systematic review and meta-analysis study
Source: PubMed Central journal article supplement (PMC10790125; doi:10.34172/hpp.2023.32), 2023-12-16

### Supplementary file 3. Funnel Plots for assessing probability of publication bias

A- Funnel plot for mean of speed

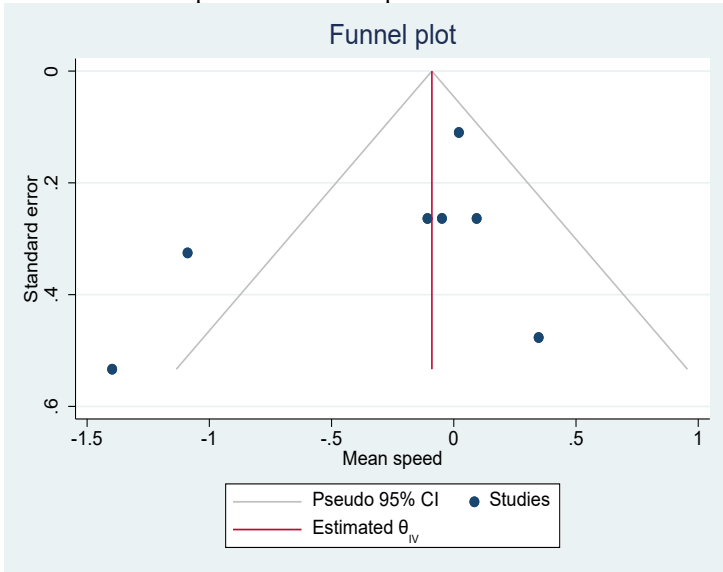

B- Funnel plot for reaction/response time

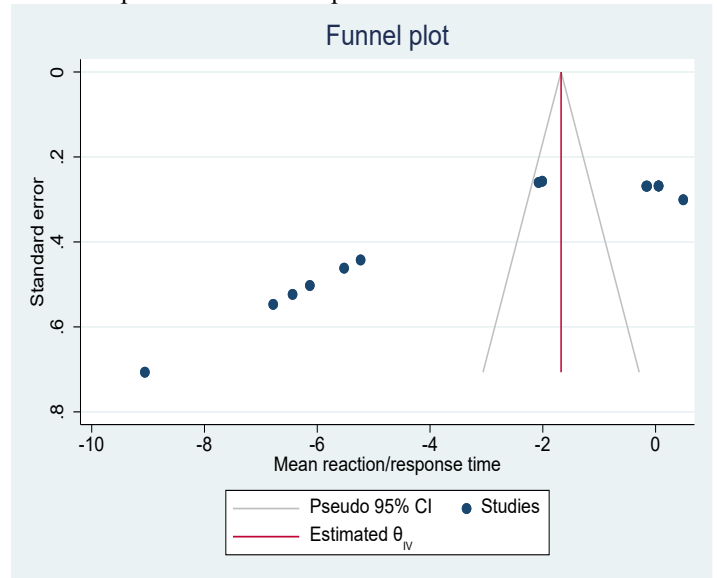

C- Funnel plot for delay in response

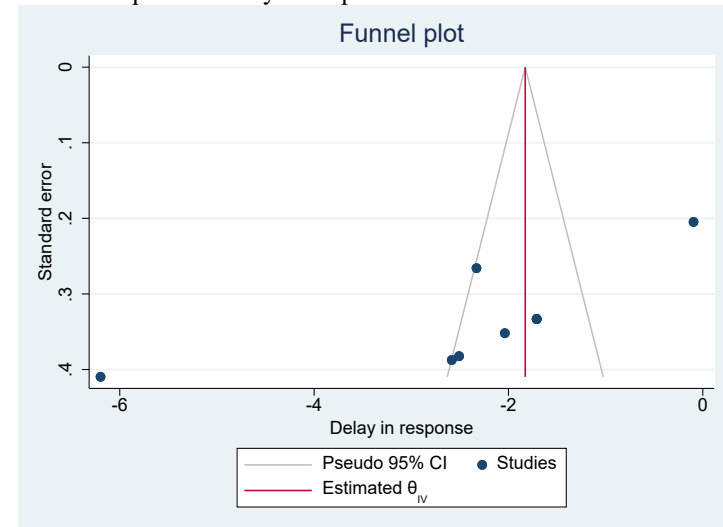

D- Funnel plot for Coherence

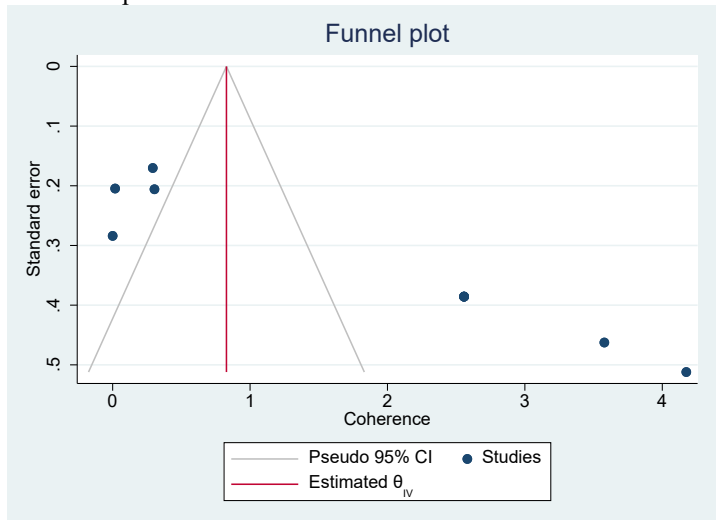

E- Funnel plot for Heart Rate

F- Funnel plot for Heart rate variability

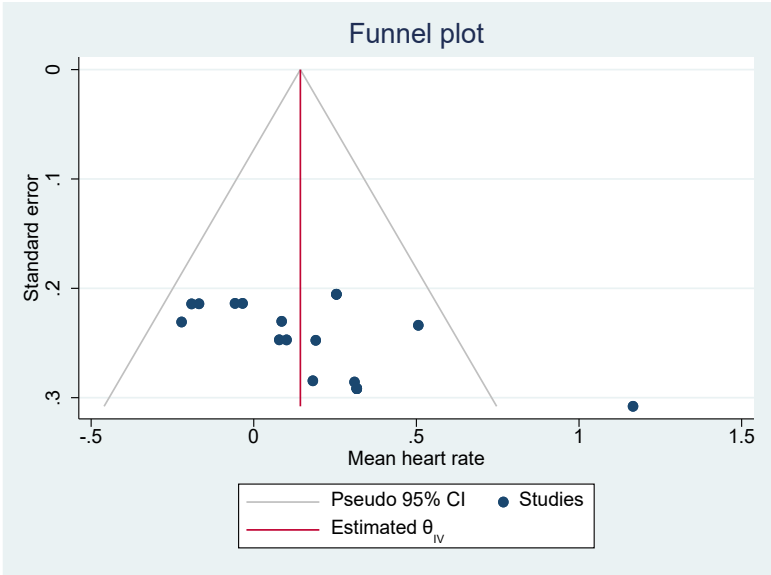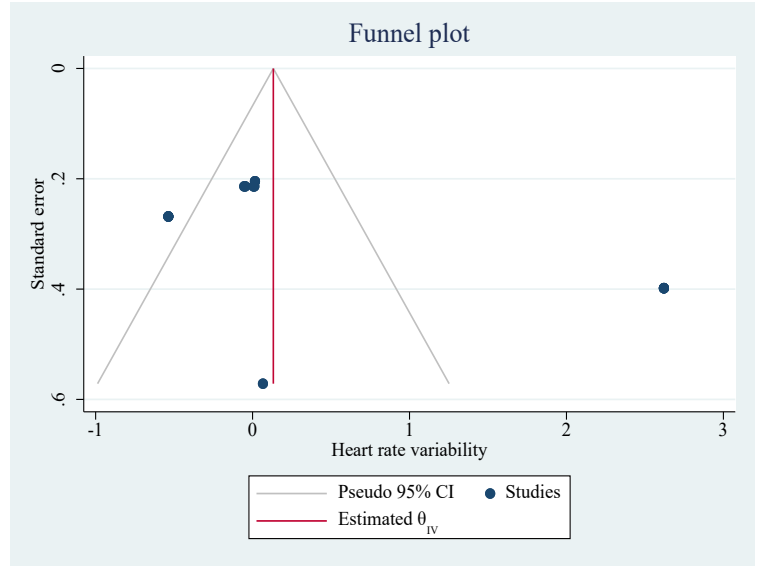

G- Funnel plot for Mean level of arousal

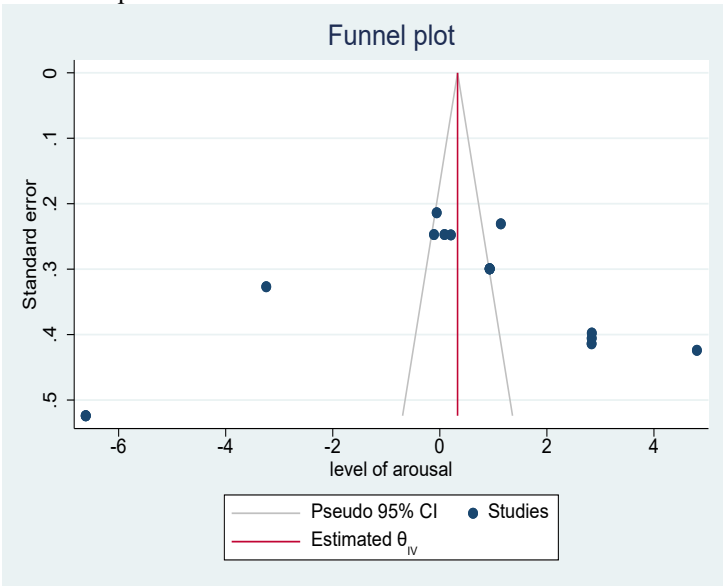

H- Funnel plot for Mental Load

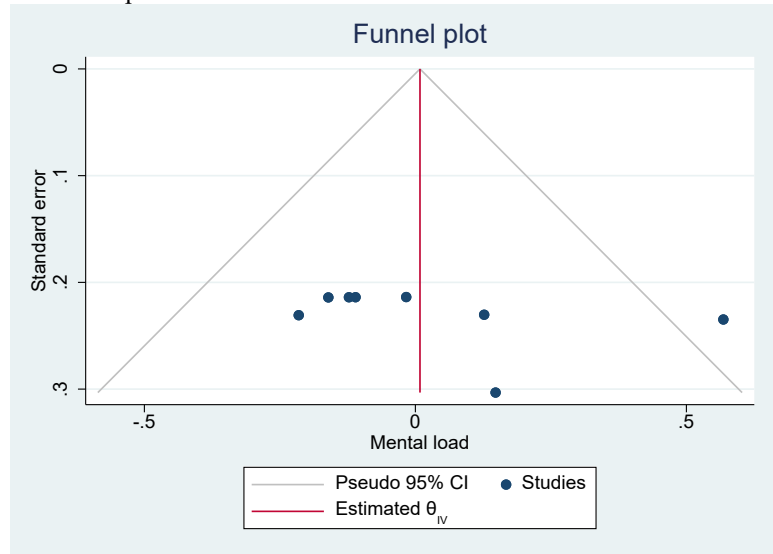

Supplement: hpp-13-267-s003.pdf [file hpp-13-267-s003.pdf]
